# Supplementary material for: Health-Related Social Needs Screening Tool Among Patients Receiving Hemodialysis: Evaluation of Sensitivity and Specificity
Source: PubMed Central journal article supplement — Kidney Med. 2023 Jul 24;5(9):100702. doi: 10.1016/j.xkme.2023.100702 (PMC10491936; doi:10.1016/j.xkme.2023.100702), 2023-07-24
Supplement: mmc1.pdf [file mmc1.pdf]

**Supplement Table S1.** Participant Characteristics.

| Characteristic                                  | N = 32         |
|-------------------------------------------------|----------------|
| Age, mean (SD); range                           | 56 (12); 21-74 |
| Sex, n (%)                                      |                |
| Male                                            | 14 (44)        |
| Female                                          | 18 (56)        |
| Identified as Hispanic                          | 15 (53)        |
| Dialysis modality in-center hemodialysis, n (%) | 32 (100)       |
| Vascular access                                 |                |
| Arteriovenous fistula                           | 18 (56)        |
| Arteriovenous graft                             | 7 (22)         |
| Central venous catheter                         | 7 (22)         |
| Prior kidney transplant                         | 4 (13)         |
| Unemployed, n (%)                               | 30 (94)        |
| Education level, n (%)                          |                |
| No School                                       | 0 (0)          |
| Less than high-school                           | 25 (78)        |
| High-school                                     | 2 (6)          |
| More than high-school                           | 5 (16)         |
| Health insurance, n (%)                         |                |
| Medicare                                        | 1 (3)          |
| Medicaid                                        | 9 (28)         |
| Medicare and Medicaid                           | 21 (66)        |
| Other                                           | 1 (3)          |
| Annual income                                   |                |
| <\$25,000                                       | 27 (84)        |
| \$25,000-\$50,000                               | 5 (16)         |
| Difficulty affording medications, n (%)         | 8 (25)         |
| Housing, n (%)                                  | 14 (44)        |
| Food insecurity, n (%)                          | 20 (63)        |
| Utility issues, n (%)                           | 8 (25)         |
| Transportation issues, n (%)                    | 17 (53)        |
| Comorbidities, n (%)                            |                |
| Myocardial infarction                           | 5 (16%)        |
| Heart failure                                   | 11 (34%)       |
| Stroke                                          | 8 (25%)        |
| Heart valve problem                             | 5 (16%)        |
| Coronary bypass                                 | 1 (3%)         |
| Hypertension                                    | 31 (97%)       |
| Lung disease                                    | 7 (22%)        |
| Diabetes                                        | 19 (59%)       |
| Amputation                                      | 4 (13%)        |
| Peptic ulcer disease                            | 9 (28%)        |
| Liver disease                                   | 1 (3%)         |
| Anemia                                          | 15 (47%)       |
| Cancer                                          | 5 (16%)        |
